# Supplementary material
Source: Springer Nature journal article supplement (https://www.springermedizin.de/resource/supplementary/13058_2010_2596_MOESM8_ESM.pdf/9701780)
Supplement: MOESM8 [file 9701780]

**A**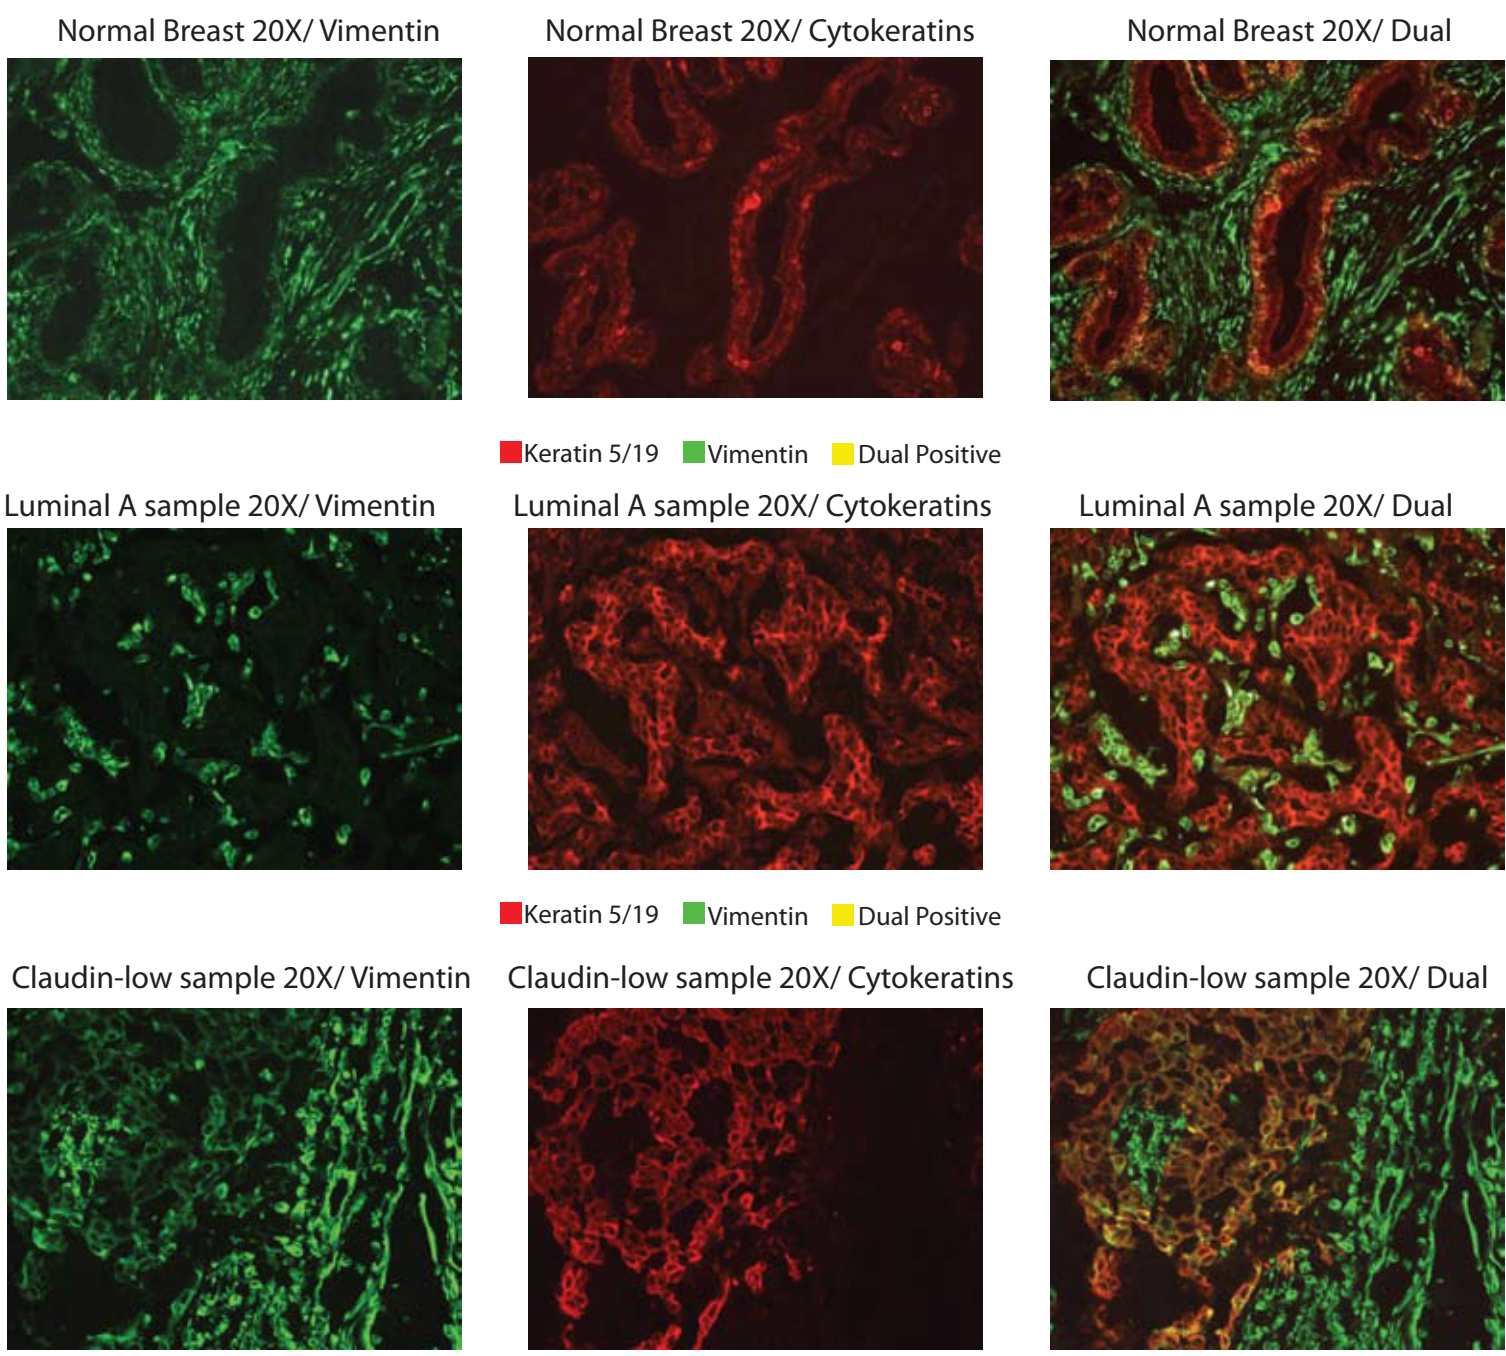**B**

Vimentin and Pan-Cytokeratin IF Dual Staining in 86 Breast Cancers.

| Subtype       | Samples with Dual Negativity | %    | Samples with Dual Positivity | %   | Total Samples |
|---------------|------------------------------|------|------------------------------|-----|---------------|
| Claudin-low   | 9                            | 45%  | 11                           | 55% | 20            |
| Basal-like    | 4                            | 22%  | 14                           | 78% | 18            |
| HER2-enriched | 6                            | 86%  | 1                            | 14% | 7             |
| Luminal B     | 20                           | 91%  | 2                            | 9%  | 22            |
| Luminal A     | 19                           | 100% | 0                            | 0%  | 19            |
| Total         | 58                           | 67%  | 28                           | 33% | 86            |

**Statistics (Chi-square test)**

|                           | P-value |
|---------------------------|---------|
| Claudin-low vs rest       | 0.01    |
| Basal-like vs rest        | 0.001   |
| Claudin-low vs Basal-like | 0.1394  |
